# Supplementary material for: An enriched biosignature of gut microbiota-dependent metabolites characterizes maternal plasma in a mouse model of fetal alcohol spectrum disorder
Source: PubMed Central journal article supplement (PMC7794323; doi:10.1038/s41598-020-80093-8), 2021-01-08
Supplement: 41598_2020_80093_MOESM1_ESM.pdf [file 41598_2020_80093_MOESM1_ESM.pdf]

**Supplementary Materials for:**

**“An Enriched Biosignature of Gut Microbiota-Dependent Metabolites Characterizes Maternal Plasma in a Mouse Model of Fetal Alcohol Spectrum Disorder”**

Manjot S. Virdee, Nipun Saini, Colin D. Kay, Andrew P. Neilson, Sze Ting Cecilia Kwan, Kaylee K. Helfrich, Sandra M. Mooney, and Susan M. Smith

**Supplementary Table S1.  
Maternal-Fetal Growth and Survival Characteristics**

|                                      | <u>Controls</u> | <u>Alcohol-Exposed</u> | <u>p-Value</u> |
|--------------------------------------|-----------------|------------------------|----------------|
| Maternal Weight at E0.5, g           | 18.37 ± 1.18    | 18.16 ± 1.09           | 0.71           |
| Maternal Weight at E8.5, g           | 21.20 ± 1.68    | 21.10 ± 1.36           | 0.88           |
| Maternal Weight Gain (E0.5-E17.5), g | 13.96 ± 2.23    | 13.28 ± 2.25           | 0.52           |
| Maternal Weight Gain (E8.5-E17.5), g | 11.08 ± 1.50    | 10.35 ± 1.47           | 0.28           |
| Litter Size at E17.5                 | 7.00 ± 1.22     | 7.11 ± 1.36            | 0.85           |
| Fetal Weight at E17.5, g             | 0.92 ± 0.11     | 0.88 ± 0.12            | 0.31           |
| Resorptions at E17.5                 | 1.00 ± 1.00     | 1.00 ± 1.22            | 0.81           |
| Percent Survival at E17.5 *          | 88.8 ± 3.58     | 84.7 ± 4.57            | 0.69           |

All values are mean ± SD. with N=9 dams per treatment group. Statistical comparisons using ANOVA (for normal data with equal variance) or Kruskal-Wallis test (for non-normal data and/or data with unequal variance).

\*Percent Survival calculated as [Number of live fetuses / (number of live fetuses + number of resorptions)] × 100.

**Supplementary Table S2.**  
**Microbial-Derived Products that Drive Dimensions 1 and 2 in the Hierarchical Clustering.**

| <b>Metabolite</b>                     | <b>F-C</b> | <b>Q-Value</b> | <b>PCA 1</b> | <b>PCA 2</b> |
|---------------------------------------|------------|----------------|--------------|--------------|
| <b>Cluster 1</b>                      |            |                |              |              |
| 2,6-dihydroxybenzoic acid             | 2.54       | 0.0021         | 0.7752688    | -0.4351092   |
| 2-hydroxyhippurate (salicylurate)     | 2.91       | 0.0277         | 0.7584338    | -0.0953286   |
| 3-(3-hydroxyphenyl)propionate sulfate | 2.61       | 0.0462         | 0.5634596    | -0.1519389   |
| 3-(4-hydroxyphenyl)propionate         | 3.45       | 0.0244         | 0.5751308    | -0.4839515   |
| 3-ethylphenylsulfate                  | 2.05       | 0.0076         | 0.6555667    | -0.5171646   |
| 3-formylindole                        | 1.50       | 0.0021         | 0.8332612    | -0.2511513   |
| 3-hydroxypyridine sulfate             | 3.57       | 0.0076         | 0.7443017    | -0.3851936   |
| 3-indoleglyoxylic acid                | 1.48       | 0.0139         | 0.7904930    | -0.0868398   |
| 3-phenylpropionate (hydrocinnamate)   | 3.69       | 0.0076         | 0.5436052    | -0.3792856   |
| 4-acetylphenyl sulfate                | 7.69       | 0.0066         | 0.7675759    | -0.2719357   |
| 4-allylphenol sulfate                 | 2.53       | 0.0680         | 0.7526993    | 0.1000044    |
| 4-ethylphenol glucuronide             | 3.28       | 0.0076         | 0.8375959    | -0.3614704   |
| 4-ethylphenyl sulfate                 | 2.11       | 0.0255         | 0.8198300    | -0.2521090   |
| 4-hydroxycinnamate                    | 7.23       | 0.0021         | 0.8539094    | -0.3314298   |
| 4-hydroxycinnamate sulfate            | 7.57       | 0.0076         | 0.8518206    | -0.2591238   |
| 4-methylcatechol sulfate              | 3.11       | 0.0030         | 0.7300599    | -0.2779232   |
| 4-vinylcatechol sulfate               | 3.91       | 0.0021         | 0.7556210    | -0.4518426   |
| 4-vinylphenol sulfate                 | 1.91       | 0.0100         | 0.8585357    | -0.1534378   |
| beta-sitosterol                       | 1.40       | 0.0557         | 0.7709181    | 0.0538341    |
| caffeic acid sulfate                  | 3.21       | 0.0021         | 0.8487926    | -0.3407625   |
| campesterol                           | 1.28       | 0.0449         | 0.8448519    | 0.1240419    |
| catechol sulfate                      | 7.41       | 0.0021         | 0.8673520    | -0.2944675   |
| cinnamate                             | 5.28       | 0.0076         | 0.7580338    | -0.2742997   |
| enterolactone (isocitric lactone)     | 1.64       | 0.0139         | 0.7673101    | -0.2049301   |
| enterolactone sulfate                 | 5.32       | 0.0183         | 0.7221703    | 0.0233456    |
| ergothioneine                         | 1.92       | 0.0139         | 0.6723721    | 0.1089141    |
| ferulic acid 4-sulfate                | 4.50       | 0.0076         | 0.7897056    | -0.3431169   |
| gentisate                             | 3.99       | 0.0021         | 0.9273447    | -0.0504719   |
| gluconate                             | 1.39       | 0.2131         | 0.5059782    | -0.4340679   |
| hippurate                             | 3.37       | 0.0021         | 0.8759632    | -0.2947280   |
| histidine betaine (hercynine)         | 1.99       | 0.1017         | 0.5616067    | 0.0500921    |
| indoleacetate                         | 1.46       | 0.0021         | 0.6343635    | -0.4379542   |
| methyl-4-hydroxybenzoate sulfate      | 3.13       | 0.0097         | 0.6557600    | -0.2658955   |
| phenol sulfate                        | 3.20       | 0.0139         | 0.7212892    | -0.1465567   |
| salicin                               | 12.98      | 0.0097         | 0.7885188    | -0.2487080   |
| salicylate                            | 3.11       | 0.0076         | 0.8981055    | 0.1034211    |
| tartarate                             | 1.59       | 0.1017         | 0.4954565    | -0.5476356   |
| tartronate (hydroxymalonate)          | 1.68       | 0.0021         | 0.8284888    | 0.1832853    |
| taurohyodeoxycholic acid              | 2.21       | 0.0905         | 0.2249110    | -0.6240830   |
| threonate                             | 1.86       | 0.0021         | 0.8701176    | 0.1092360    |
| ursocholate                           | 2.19       | 0.0850         | 0.6531903    | -0.0790253   |
| <b>Cluster 2</b>                      |            |                |              |              |
| 1H-indole-7-acetic acid               | 1.32       | 0.7981         | 0.2464132    | 0.5716379    |

|                          |      |        |           |           |
|--------------------------|------|--------|-----------|-----------|
| 4-methylbenzenesulfonate | 1.05 | 0.8168 | 0.3340250 | 0.0036705 |
| methyl indole-3-acetate  | 0.77 | 0.7682 | 0.0765753 | 0.0609480 |

### Cluster 3

|                         |      |        |           |            |
|-------------------------|------|--------|-----------|------------|
| 2-aminophenol sulfate   | 1.89 | 0.0462 | 0.4772276 | -0.3670068 |
| 2-oxindole-3-acetate    | 1.32 | 0.3170 | 0.4934865 | -0.2048566 |
| 4-hydroxyhippurate      | 2.68 | 0.0100 | 0.7770098 | -0.2280412 |
| cinnamoylglycine        | 4.86 | 0.0126 | 0.7325696 | -0.1480215 |
| dihydrocaffeate sulfate | 1.44 | 0.1859 | 0.5188975 | 0.0976087  |
| erythritol              | 1.10 | 0.8549 | 0.3246582 | 0.0443041  |
| indolelactate           | 1.76 | 0.0021 | 0.6259044 | -0.2141652 |
| indolin-2-one           | 1.47 | 0.0680 | 0.3984721 | -0.0303745 |
| mannonate               | 1.21 | 0.8549 | 0.5573894 | 0.3145222  |
| ribitol                 | 2.23 | 0.0255 | 0.6099912 | -0.2535124 |
| thymol sulfate          | 1.96 | 0.4964 | 0.3677674 | 0.0843172  |

### Cluster 4

|                         |      |        |            |           |
|-------------------------|------|--------|------------|-----------|
| 6-hydroxyindole sulfate | 0.99 | 1.0000 | -0.0924610 | 0.3518308 |
| N-methylpipercolate     | 1.13 | 0.6096 | 0.4520928  | 0.6020761 |
| p-cresol glucuronide    | 0.80 | 0.3169 | -0.3530030 | 0.3028724 |
| p-cresol sulfate        | 1.03 | 1.0000 | 0.1224484  | 0.3639081 |
| stachydrine             | 0.92 | 0.2850 | 0.2092769  | 0.4994248 |

### Cluster 5

|                            |      |        |            |            |
|----------------------------|------|--------|------------|------------|
| 12-dehydrocholate          | 0.02 | 0.0193 | -0.7987420 | -0.2208106 |
| 3-dehydrocholate           | 0.09 | 0.8168 | -0.6010296 | -0.5753394 |
| 6-beta-hydroxylithocholate | 0.35 | 0.8818 | -0.3620295 | -0.4266377 |
| 7-ketodeoxycholate         | 0.15 | 0.4964 | -0.6458032 | -0.4714987 |
| benzoate                   | 1.07 | 0.4631 | -0.0176586 | -0.4394711 |
| deoxycholate               | 0.43 | 0.7171 | -0.5468652 | -0.4441932 |
| glycocholate               | 1.47 | 0.3577 | 0.0162101  | -0.5989848 |
| indolepropionate           | 0.41 | 0.0139 | -0.7083837 | 0.1287851  |
| taurodeoxycholate          | 0.48 | 0.2850 | -0.1696046 | -0.5227686 |
| tauroursodeoxycholate      | 0.26 | 0.9162 | -0.5758796 | -0.5328175 |
| ursodeoxycholate           | 0.18 | 0.1890 | -0.7154062 | -0.2721035 |

\* N=9 control, N=8 alcohol. F-C, fold-change; q-values from Mann-Whitney U-test followed by Benjamini-Hochberg correction.

**Supplementary Table S3.**  
**Microbial-Derived Products by Cluster from the Hierarchical Clustering on Spearman's Correlation.**

| Cluster                 | Metabolite                            | F-C    | Q-Value   | PCA        |
|-------------------------|---------------------------------------|--------|-----------|------------|
| 1                       | 1H-indole-7-acetic acid               | 1.32   | 0.7981    | 0.2464132  |
|                         | 4-methylbenzenesulfonate              | 1.05   | 0.8168    | 0.3340250  |
|                         | 6-beta-hydroxylithocholate            | 0.35   | 0.8818    | -0.3620295 |
|                         | 6-hydroxyindole sulfate               | 0.99   | 1.0000    | -0.0924610 |
|                         | benzoate                              | 1.07   | 0.4631    | -0.0176586 |
|                         | glycocholate                          | 1.47   | 0.3577    | 0.0162101  |
|                         | mannonate                             | 1.21   | 0.8549    | 0.5573894  |
|                         | N-methylpipercolate                   | 1.13   | 0.6096    | 0.4520928  |
|                         | stachydrine                           | 0.92   | 0.2850    | 0.2092769  |
|                         | taurodeoxycholate                     | 0.48   | 0.2850    | -0.1696046 |
|                         | taurohyodeoxycholic acid              | 2.21   | 0.0905    | 0.2249110  |
|                         | tauroursodeoxycholate                 | 0.26   | 0.9162    | -0.5758796 |
| thymol sulfate          | 1.96                                  | 0.4964 | 0.3677674 |            |
| 2                       | methyl indole-3-acetate               | 0.77   | 0.7682    | 0.0765753  |
|                         | p-cresol glucuronide                  | 0.80   | 0.3169    | -0.3530030 |
|                         | p-cresol sulfate                      | 1.03   | 1.0000    | 0.1224484  |
| 3                       | 3-dehydrocholate                      | 0.09   | 0.8168    | -0.6010296 |
|                         | 7-ketodeoxycholate                    | 0.15   | 0.4964    | -0.6458032 |
|                         | deoxycholate                          | 0.43   | 0.7171    | -0.5468652 |
|                         | hercynine                             | 1.99   | 0.1017    | 0.5616067  |
|                         | ursodeoxycholate                      | 0.18   | 0.1890    | -0.7154062 |
| 4                       | 2-aminophenol sulfate                 | 1.89   | 0.0462    | 0.4772276  |
|                         | 2-oxindole-3-acetate                  | 1.32   | 0.3170    | 0.4934865  |
|                         | dihydrocaffeate sulfate               | 1.44   | 0.1859    | 0.5188975  |
|                         | erythritol                            | 1.10   | 0.8549    | 0.3246582  |
|                         | indolin-2-one                         | 1.47   | 0.0680    | 0.3984721  |
| 5                       | 12-dehydrocholate                     | 0.02   | 0.0193    | -0.7987420 |
|                         | 2,6-dihydroxybenzoic acid             | 2.54   | 0.0021    | 0.7752689  |
|                         | 2-hydroxyhippurate (salicylurate)     | 2.91   | 0.0277    | 0.7584338  |
|                         | 3-(3-hydroxyphenyl)propionate sulfate | 2.61   | 0.0462    | 0.5634596  |
|                         | 3-(4-hydroxyphenyl)propionate         | 3.45   | 0.0244    | 0.5751308  |
|                         | 3-ethylphenylsulfate                  | 2.05   | 0.0076    | 0.6555667  |
|                         | 3-formylindole                        | 1.50   | 0.0021    | 0.8332612  |
|                         | 3-hydroxypyridine sulfate             | 3.57   | 0.0076    | 0.7443017  |
|                         | 3-indoleglyoxylic acid                | 1.48   | 0.0139    | 0.7904930  |
|                         | 3-phenylpropionate (hydrocinnamate)   | 3.69   | 0.0076    | 0.5436053  |
|                         | 4-acetylphenyl sulfate                | 7.69   | 0.0066    | 0.7675759  |
|                         | 4-allylphenol sulfate                 | 2.53   | 0.0680    | 0.7526993  |
|                         | 4-ethylphenol glucuronide             | 3.28   | 0.0076    | 0.8375959  |
|                         | 4-ethylphenyl sulfate                 | 2.11   | 0.0255    | 0.8198300  |
|                         | 4-hydroxycinnamate                    | 7.23   | 0.0021    | 0.8539094  |
|                         | 4-hydroxycinnamate sulfate            | 7.57   | 0.0076    | 0.8518207  |
|                         | 4-hydroxyhippurate                    | 2.68   | 0.0100    | 0.7770098  |
|                         | 4-methylcatechol sulfate              | 3.11   | 0.0030    | 0.7300599  |
| 4-vinylcatechol sulfate | 3.91                                  | 0.0021 | 0.7556210 |            |

|                                  |       |        |            |
|----------------------------------|-------|--------|------------|
| 4-vinylphenol sulfate            | 1.91  | 0.0100 | 0.8585357  |
| beta-sitosterol                  | 1.40  | 0.0557 | 0.7709181  |
| caffeic acid sulfate             | 3.21  | 0.0021 | 0.8487926  |
| campesterol                      | 1.28  | 0.0449 | 0.8448519  |
| catechol sulfate                 | 7.41  | 0.0021 | 0.8673521  |
| cinnamate                        | 5.28  | 0.0076 | 0.7580338  |
| cinnamoylglycine                 | 4.86  | 0.0126 | 0.7325696  |
| enterolactone                    | 1.64  | 0.0139 | 0.7673101  |
| enterolactone sulfate            | 5.32  | 0.0183 | 0.7221703  |
| ergothioneine                    | 1.92  | 0.0139 | 0.6723721  |
| ferulic acid 4-sulfate           | 4.50  | 0.0076 | 0.7897056  |
| gentisate                        | 3.99  | 0.0021 | 0.9273448  |
| gluconate                        | 1.39  | 0.2131 | 0.5059782  |
| hippurate                        | 3.37  | 0.0021 | 0.8759632  |
| indoleacetate                    | 1.46  | 0.0021 | 0.6343635  |
| indolelactate                    | 1.76  | 0.9921 | 0.6259044  |
| indolepropionate                 | 0.41  | 0.0139 | -0.7083837 |
| methyl-4-hydroxybenzoate sulfate | 3.13  | 0.0097 | 0.6557600  |
| phenol sulfate                   | 3.20  | 0.0139 | 0.7212892  |
| ribitol                          | 2.23  | 0.0255 | 0.6099912  |
| salicin                          | 12.98 | 0.0097 | 0.7885188  |
| salicylate                       | 3.11  | 0.0076 | 0.8981055  |
| tartarate                        | 1.59  | 0.1017 | 0.4954565  |
| tartronate (hydroxymalonate)     | 1.68  | 0.1017 | 0.8284888  |
| threonate                        | 1.86  | 0.0021 | 0.8701177  |
| ursocholate                      | 2.19  | 0.0850 | 0.6531904  |

\* N=9 control, N=8 alcohol. F-C, fold-change; q-values from Mann-Whitney U-test followed by Benjamini-Hochberg correction.

**Supplementary Table S4.**  
**Composition of Rodent Diet AIN-93G**

| <u>Ingredient</u>  | <u>g/kg diet</u> |
|--------------------|------------------|
| Casein             | 200.0            |
| L-Cystine          | 3.0              |
| Corn Starch        | 397.486          |
| Maltodextrin       | 132.0            |
| Sucrose            | 100.0            |
| Soybean Oil        | 70.0             |
| Cellulose          | 50.0             |
| Mineral Mix*       | 35.0             |
| Vitamin Mix**      | 10.0             |
| Choline Bitartrate | 2.5              |
| TBHQ               | 0.014            |

\* AIN-93G-MX (Envigo #94046), [68]

\*\* AIN-93-VX (Envigo #94047), [68]



|                                  |         |         |         |         |         |         |         |         |         |         |         |         |         |         |         |         |         |         |
|----------------------------------|---------|---------|---------|---------|---------|---------|---------|---------|---------|---------|---------|---------|---------|---------|---------|---------|---------|---------|
| mannonate*                       | 7918888 | 7550331 | 4888171 | 8034779 | 6103057 | 5094990 | 7852097 | 2608428 | 4982162 | 6355324 | 7448460 | 7847582 | 1.3E+07 | 7221596 | 2960030 | 5250180 | 4827649 | 7737912 |
| methyl indole-3-acetate          | 767521  | 613317  | 731266  | 974779  | 3367185 | 299362  | 601302  | 542562  | 1027442 | 1386327 | 917539  | 1222700 | 461125  | 278889  | 1079609 | 592418  | 576498  | 703570  |
| methyl-4-hydroxybenzoate sulfate | 20506   |         |         |         |         |         |         |         |         | 73411   | 119757  | 38998   |         | 32612   |         | 100450  | 79191   | 49000   |
| N-methylpipercolate              | 547122  | 445215  | 472305  | 570748  | 429966  | 627064  | 861723  | 172887  | 380129  | 468037  | 549495  | 528741  | 822173  | 526685  | 358908  | 452674  | 554550  | 660222  |
| p-cresol glucuronide*            | 6371945 | 6166874 | 8639573 | 4946464 | 5311396 | 6041844 | 1.1E+07 | 4482697 | 1E+07   | 3837436 | 4917901 | 3558334 | 7321320 | 6179428 | 1066906 | 3883283 | 2748669 | 1.3E+07 |
| p-cresol sulfate                 | 1.4E+08 | 1.3E+08 | 1.8E+08 | 1.1E+08 | 1.3E+08 | 1.1E+08 | 1.9E+08 | 7.8E+07 | 1.5E+08 | 1.2E+08 | 1.3E+08 | 1.3E+08 | 1.7E+08 | 1.4E+08 | 5.3E+07 | 1.3E+08 | 9.8E+07 | 2.3E+08 |
| phenol sulfate                   | 1.3E+07 | 1962269 | 7675539 | 3424654 | 7786109 | 1986426 | 4189223 | 3614404 | 4458544 | 1.6E+07 | 2.2E+07 | 1.2E+07 | 2.2E+07 | 6877995 | 5823281 | 1.5E+07 | 1.2E+07 | 3.2E+07 |
| ribitol                          | 466906  | 517181  | 540469  | 544967  | 497952  | 404370  | 427362  | 428631  | 573894  | 525863  | 2497297 | 695168  | 1415869 | 996199  | 356783  | 534151  | 556707  | 1669226 |
| salicin                          |         | 25468   | 83702   | 142524  |         |         |         |         |         | 111189  | 1477019 | 422842  | 124486  | 303483  | 85153   | 230268  | 1381810 | 615109  |
| salicylate                       | 4203778 | 2279161 | 2516090 | 4622484 | 1762834 | 1787908 | 2145020 | 556251  | 558721  | 4562691 | 1.1E+07 | 8717915 | 4657727 | 3406306 | 5939567 | 6935151 | 8568354 | 8467040 |
| stachydrine                      | 1029393 | 2250072 | 1530627 | 1458497 | 1054093 | 2507366 | 1.2E+07 | 1133312 | 958952  | 2141080 | 4068865 | 2282114 | 2946094 | 1357213 | 3126798 | 3438069 | 1596936 | 2024468 |
| tartrate                         | 1.3E+07 | 3.1E+07 | 3.1E+07 | 2.3E+07 | 2.3E+07 | 2393263 | 5093012 | 2E+07   | 1.8E+07 | 3.7E+07 | 2.9E+07 | 3.8E+07 | 2.4E+07 | 2.4E+07 | 1E+07   | 3.6E+07 | 4.1E+07 | 1.1E+07 |
| tartronate (hydroxymalonate)     | 1577387 | 1515691 | 1635180 | 1656402 | 1397505 | 1320000 | 2076409 | 817087  | 962973  | 2451397 | 2005796 | 2449840 | 2320434 | 2139720 | 1682196 | 2433366 | 3131725 | 2626018 |
| taurodeoxycholate                | 613932  | 1226839 | 1300047 | 1011012 | 1010064 | 593283  | 4166009 | 5.1E+07 | 4730597 | 5880272 | 4612142 | 2079718 | 3415961 | 8544434 | 1.3E+07 | 2650306 | 1739603 | 2821404 |
| taurohyodeoxycholic acid         |         | 221564  |         | 85558   |         |         | 341476  | 5032702 | 1902788 | 3715707 | 3169665 | 3308343 | 1360025 | 2068184 | 1.7E+07 | 1773751 | 1479680 | 443676  |
| taurooursodeoxycholate           | 1932075 | 2770167 | 2252541 | 2818460 | 2714308 | 3854375 | 5199001 | 1E+08   | 2.6E+07 | 4236255 | 4396580 | 2291170 | 2426650 | 1.3E+07 | 1.9E+07 | 3474642 | 3439031 | 4268309 |
| threonate                        | 4.4E+08 | 4.8E+08 | 4E+08   | 4.7E+08 | 3.9E+08 | 3.3E+08 | 5.2E+08 | 1.9E+08 | 2.6E+08 | 7E+08   | 6E+08   | 7.2E+08 | 8.1E+08 | 7.2E+08 | 4E+08   | 6.2E+08 | 8.6E+08 | 8E+08   |
| thymol sulfate                   |         | 53029   |         |         |         | 48567   |         |         | 30334   | 35304   | 110021  | 24428   |         |         | 59685   | 47239   | 30303   | 189907  |
| ursocholate                      | 100831  | 747211  |         |         |         | 90145   |         |         |         | 681763  | 368247  | 500972  | 457747  |         | 3190594 | 321372  | 302764  | 151701  |
| ursodeoxycholate                 | 2285518 | 4009393 | 1693780 | 2007796 | 899439  | 1592158 | 4852579 | 1.9E+07 | 3.6E+07 | 1233639 | 1820017 | 941602  |         | 2989353 | 6370950 | 1047473 | 285887  | 3388112 |
| enterolactone sulfate            | 155734  | 197523  | 156659  | 26784   | 34370   | 40070   | 53390   | 25841   | 43661   | 781812  | 325131  | 301943  | 194166  | 42749   | 148998  | 260013  | 882398  | 705020  |
| 4-vinylcatechol sulfate          | 219774  | 629837  | 434712  | 392131  | 332229  | 56811   | 89083   | 214396  | 237347  | 553062  | 1111716 | 974462  | 483552  | 568204  | 315816  | 710948  | 985011  | 579834  |



**Supplementary Figure S1.** Analysis of plasma metabolites including mouse ALC-6. **(a)** Principal component analysis places ALC-6 as an outlier that clusters within a subset of control dams. Microbial metabolite loadings are plotted against components one and two, as per Figure 1b. **(b)** K-means clustering places ALC-6 as an outlier that clusters within a subset of control dams. **(c)** PCA mapping housing assignment on each mouse identity, showing that cage assignment did not significantly affect analyte outcome. N=9 control (CON) and N=9 alcohol-exposed (ALC) dams for (S1a,b), and N=8 ALC dams for (S1c). Analyzed using FactoMiner (v.2.3) and visualized using FactoextraR (v.1.0.7).

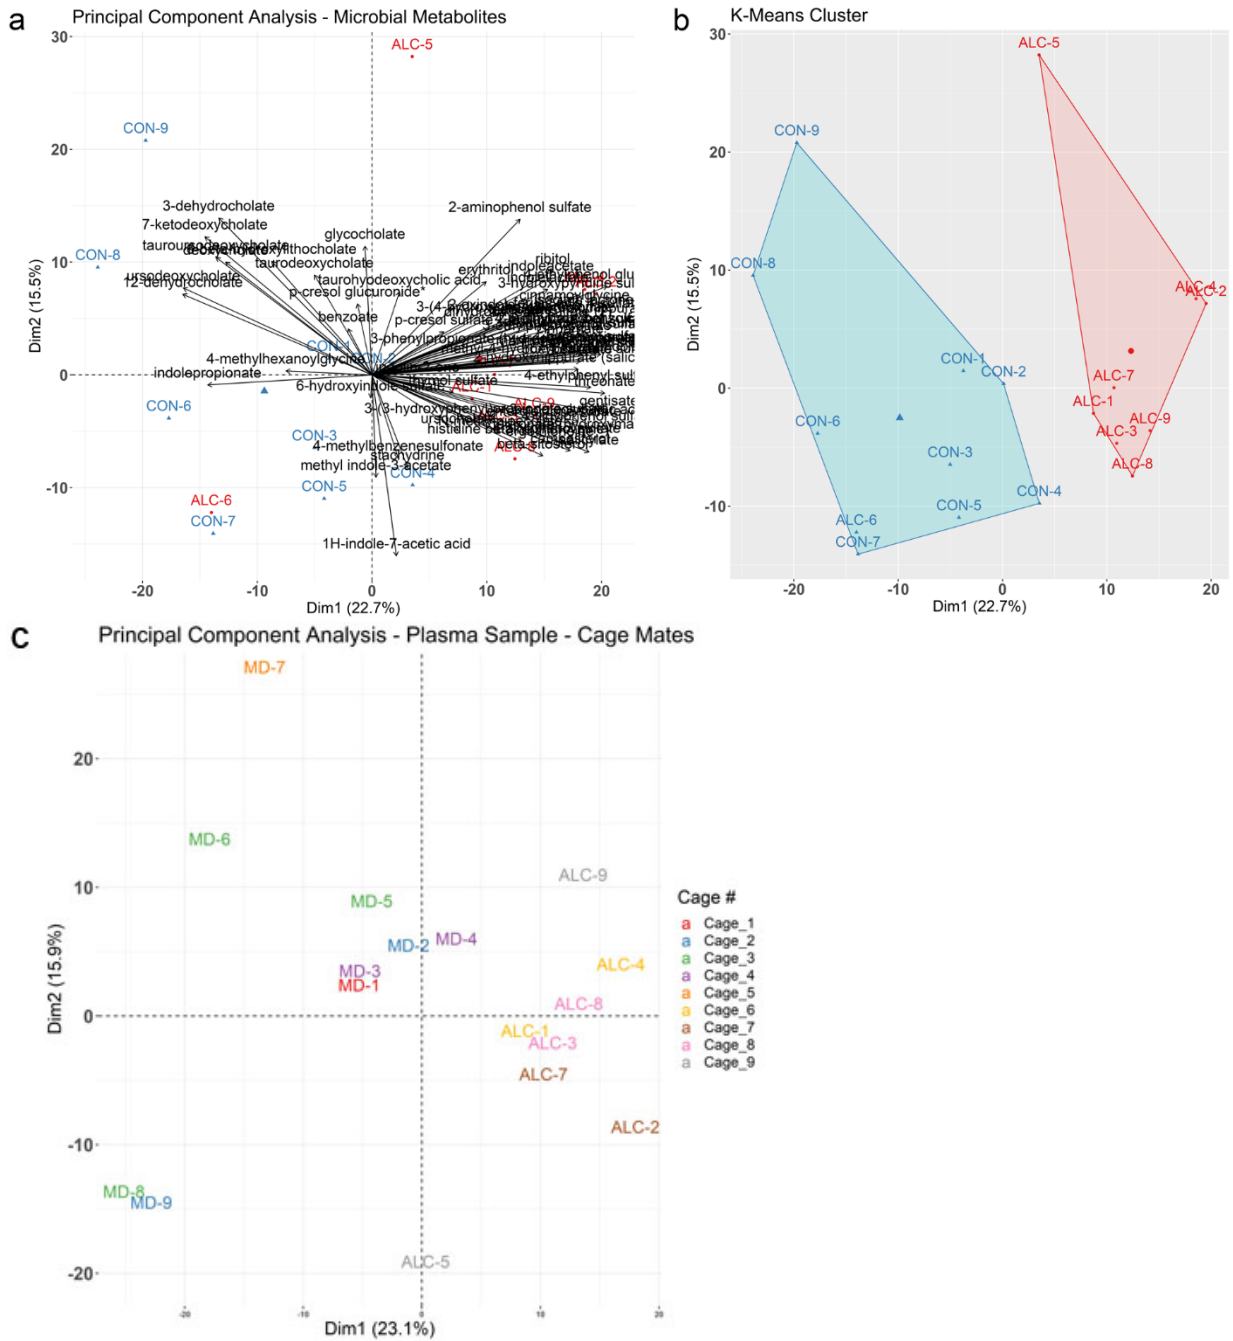

**Supplementary Figure S2.** Hierarchical clustering of the sample PCA loadings for metabolites in maternal plasma, plotted against the principal component score for Dimension 2 (presented in Supplemental Table S2). Microbial metabolites were distributed equally across the clusters, indicating they did not contribute to PCA dimension 2. Microbial metabolites are shown in red, endogenous compounds in blue, and unknown compounds in green. Visualized using ggplot (v.3.3.0).

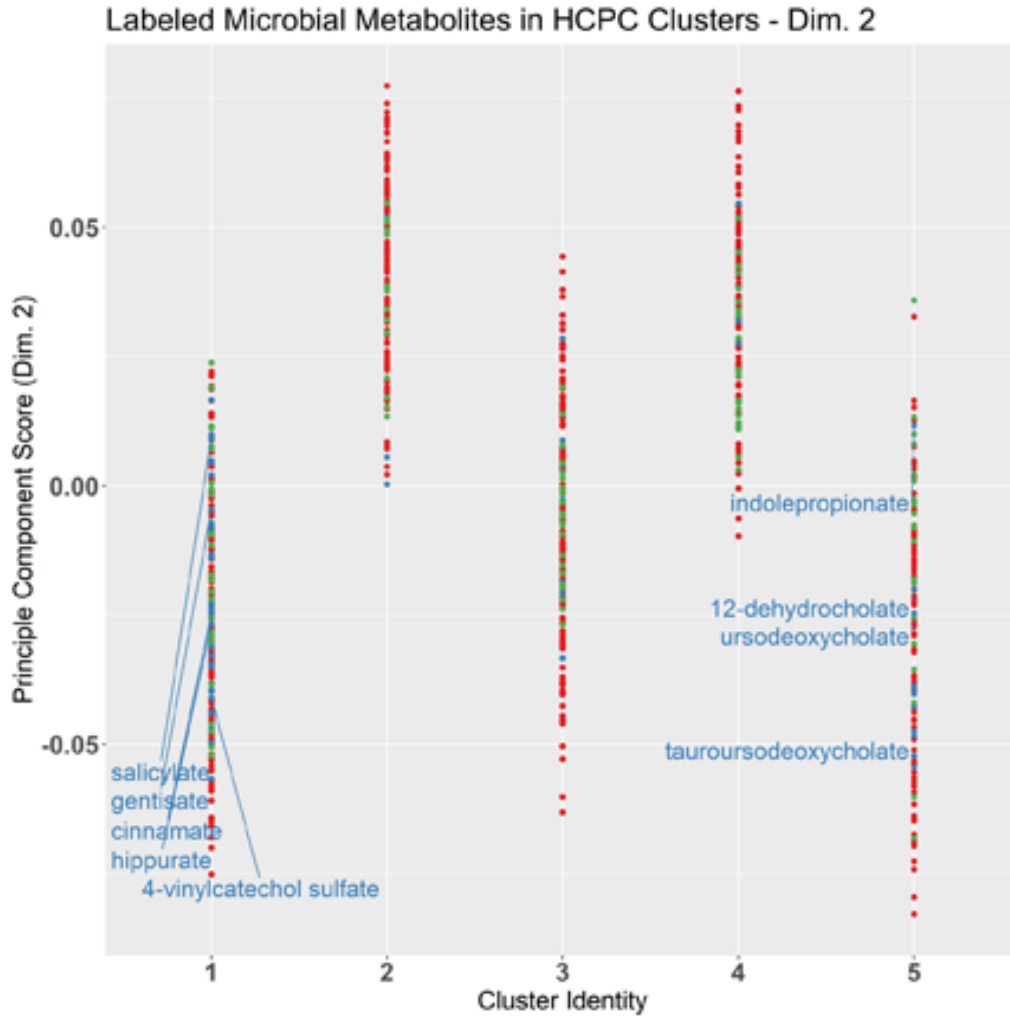

## Supplemental Methods

### Metabolon Platform Workflow

Citation for the untargeted metabolite analysis described below is Ramamoorthy, S. *mView Report on UNCH-06-18VW+*. Metabolon, Inc. Personal communication (October 31, 2018).

**Sample Accessioning:** Following receipt, samples were inventoried and immediately stored at -80°C. Each sample received was accessioned into the Metabolon LIMS system and was assigned by the LIMS a unique identifier that was associated with the original source identifier only. This identifier was used to track all sample handling, tasks, results, etc. The samples (and all derived aliquots) were tracked by the LIMS system. All portions of any sample were automatically assigned their own unique identifiers by the LIMS when a new task was created; the relationship of these samples was also tracked. All samples were maintained at -80°C until processed.

**Sample Preparation:** Samples were prepared using the automated Microlab STAR system from Hamilton Company. Several recovery standards were added prior to the first step in the extraction process for QC purposes. To remove protein, dissociate small molecules bound to protein or trapped in the precipitated protein matrix, and to recover chemically diverse metabolites, proteins were precipitated with methanol under vigorous shaking for 2 min (Glen Mills Geno/Grinder 2000) followed by centrifugation. The resulting extract was divided into five fractions: two for analysis by two separate reverse phase (RP)/UPLC-MS/MS methods with positive ion mode electrospray ionization (ESI), one for analysis by RP/UPLC-MS/MS with negative ion mode ESI, one for analysis by HILIC/UPLC-MS/MS with negative ion mode ESI, and one sample was reserved for backup. Samples were placed briefly on a TurboVap (Zymark) to remove the organic solvent. The sample extracts were stored overnight under nitrogen before preparation for analysis.

**QA/QC:** Several types of controls were analyzed in concert with the experimental samples: a pooled matrix sample generated by taking a small volume of each experimental sample (or alternatively, use of a pool of well-characterized human plasma) served as a technical replicate throughout the data set; extracted water samples served as process blanks; and a cocktail of QC standards that were carefully chosen not to interfere with the measurement of endogenous compounds were spiked into every analyzed sample, allowed instrument performance monitoring and aided chromatographic alignment. Instrument variability was determined by calculating the median relative standard deviation (RSD) for the standards that were added to each sample prior to injection into the mass spectrometers. Overall process variability was determined by calculating the median RSD for all endogenous metabolites (i.e., non-instrument standards) present in 100% of the pooled matrix samples. Experimental samples were randomized across the platform run with QC samples spaced evenly among the injections.

**Ultrahigh Performance Liquid Chromatography-Tandem Mass Spectroscopy (UPLC-MS/MS):** All methods utilized a Waters ACQUITY ultra-performance liquid chromatography (UPLC) and a Thermo Scientific Q-Exactive high resolution/accurate mass spectrometer interfaced with a heated electrospray ionization (HESI-II) source and Orbitrap mass analyzer operated at 35,000 mass resolution. The sample extract was dried then reconstituted in solvents

compatible to each of the four methods. Each reconstitution solvent contained a series of standards at fixed concentrations to ensure injection and chromatographic consistency. One aliquot was analyzed using acidic positive ion conditions, chromatographically optimized for more hydrophilic compounds. In this method, the extract was gradient eluted from a C18 column (Waters UPLC BEH C18-2.1x100 mm, 1.7  $\mu$ m) using water and methanol, containing 0.05% perfluoropentanoic acid (PFPA) and 0.1% formic acid (FA). Another aliquot was also analyzed using acidic positive ion conditions, however it was chromatographically optimized for more hydrophobic compounds. In this method, the extract was gradient eluted from the same aforementioned C18 column using methanol, acetonitrile, water, 0.05% PFPA and 0.01% FA and was operated at an overall higher organic content. Another aliquot was analyzed using basic negative ion optimized conditions using a separate dedicated C18 column. The basic extracts were gradient eluted from the column using methanol and water, however with 6.5mM Ammonium Bicarbonate at pH 8. The fourth aliquot was analyzed via negative ionization following elution from a HILIC column (Waters UPLC BEH Amide 2.1x150 mm, 1.7  $\mu$ m) using a gradient consisting of water and acetonitrile with 10mM Ammonium Formate, pH 10.8. The MS analysis alternated between MS and data-dependent MS<sub>n</sub> scans using dynamic exclusion. The scan range varied slightly between methods but covered 70-1000 m/z. Raw data files are archived and extracted as described below.

**Bioinformatics:** The informatics system consisted of four major components, the Laboratory Information Management System (LIMS), the data extraction and peak-identification software, data processing tools for QC and compound identification, and a collection of information interpretation and visualization tools for use by data analysts. The hardware and software foundations for these informatics components were the LAN backbone, and a database server running Oracle 10.2.0.1 Enterprise Edition.

**LIMS:** The purpose of the Metabolon LIMS system was to enable fully auditable laboratory automation through a secure, easy to use, and highly specialized system. The scope of the Metabolon LIMS system encompasses sample accessioning, sample preparation and instrumental analysis and reporting and advanced data analysis. All of the subsequent software systems are grounded in the LIMS data structures. It has been modified to leverage and interface with the in-house information extraction and data visualization systems, as well as third party instrumentation and data analysis software.

**Data Extraction and Compound Identification:** Raw data was extracted, peak-identified and QC processed using Metabolon's hardware and software. These systems are built on a web-service platform utilizing Microsoft's .NET technologies, which run on high-performance application servers and fiber-channel storage arrays in clusters to provide active failover and load-balancing. Compounds were identified by comparison to library entries of purified standards or recurrent unknown entities. Metabolon maintains a library based on authenticated standards that contains the retention time/index (RI), mass to charge ratio (m/z), and chromatographic data (including MS/MS spectral data) on all molecules present in the library. Furthermore, biochemical identifications are based on three criteria: retention index within a narrow RI window of the proposed identification, accurate mass match to the library +/- 10 ppm, and the MS/MS forward and reverse scores between the experimental data and authentic standards. The MS/MS scores are based on a comparison of the ions present in the experimental

spectrum to the ions present in the library spectrum. While there may be similarities between these molecules based on one of these factors, the use of all three data points can be utilized to distinguish and differentiate biochemicals. More than 3300 commercially available purified standard compounds have been acquired and registered into LIMS for analysis on all platforms for determination of their analytical characteristics. Additional mass spectral entries have been created for structurally unnamed biochemicals, which have been identified by virtue of their recurrent nature (both chromatographic and mass spectral). These compounds have the potential to be identified by future acquisition of a matching purified standard or by classical structural analysis.

**Curation:** A variety of curation procedures were carried out to ensure that a high quality data set was made available for statistical analysis and data interpretation. The QC and curation processes were designed to ensure accurate and consistent identification of true chemical entities, and to remove those representing system artifacts, mis-assignments, and background noise. Metabolon data analysts use proprietary visualization and interpretation software to confirm the consistency of peak identification among the various samples. Library matches for each compound were checked for each sample and corrected if necessary.

**Metabolite Quantification and Data Normalization:** Peaks were quantified using area-under-the-curve. For studies spanning multiple days, a data normalization step was performed to correct variation resulting from instrument inter-day tuning differences. Essentially, each compound was corrected in run-day blocks by registering the medians to equal one (1.00) and normalizing each data point proportionately (termed the “block correction”). For studies that did not require more than one day of analysis, no normalization is necessary, other than for purposes of data visualization. In certain instances, biochemical data may have been normalized to an additional factor (e.g., cell counts, total protein as determined by Bradford assay, osmolality, etc.) to account for differences in metabolite levels due to differences in the amount of material present in each sample.
